# Supplementary material for: Proteomics identifies complement protein signatures in patients with alcohol-associated hepatitis
Source: JCI journal article supplement (doi:10.1172/jci.insight.174127), 2024-04-04
Supplement: sd2 [file 2]

## Figure 2 Liver Explants

CD59  
#725, CST 65055S, 18kDa  
Primary = 1:1000  
Secondary = 1:20,000 rabbit  
Blocked in 5% MILK + TBST

1m exposure

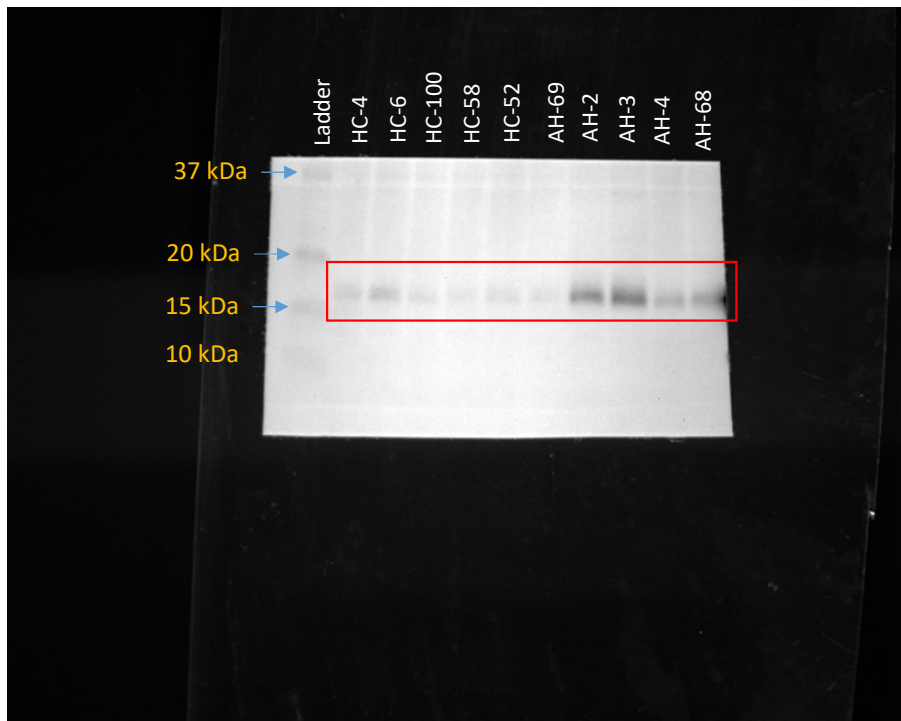

HSC70  
#104, SC-7298 santa cruz ~70kDa  
Primary = 1:16,000 1hr RT  
Secondary = 1:20,000 mouse

1m exposure

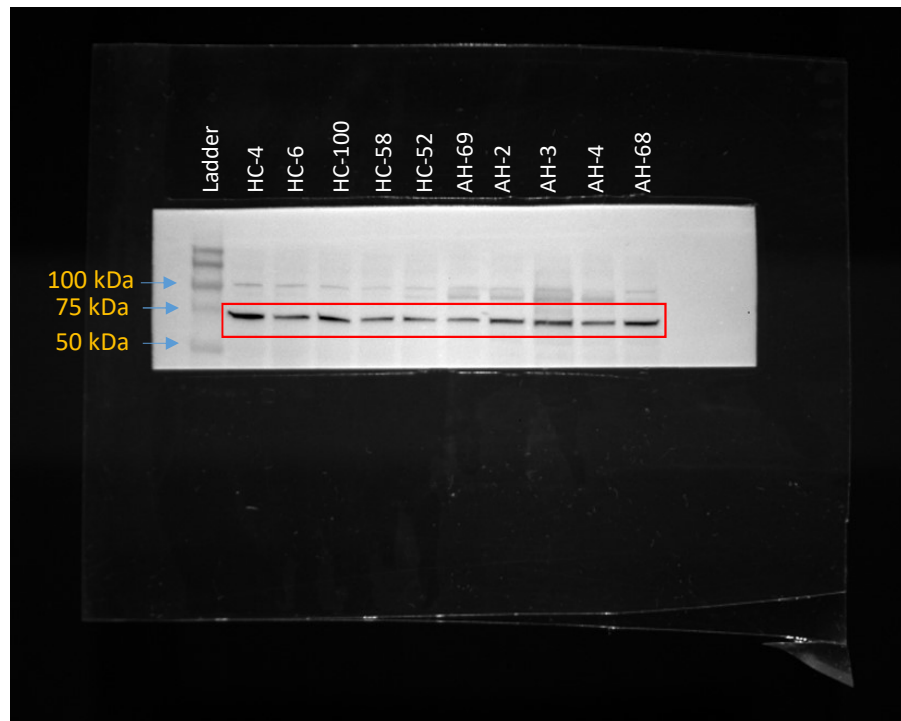

CD59  
#725, CST 65055S, 18kDa  
Primary = 1:1000  
Secondary = 1:20,000 rabbit  
Blocked in 5% MILK + TBST

1m exposure

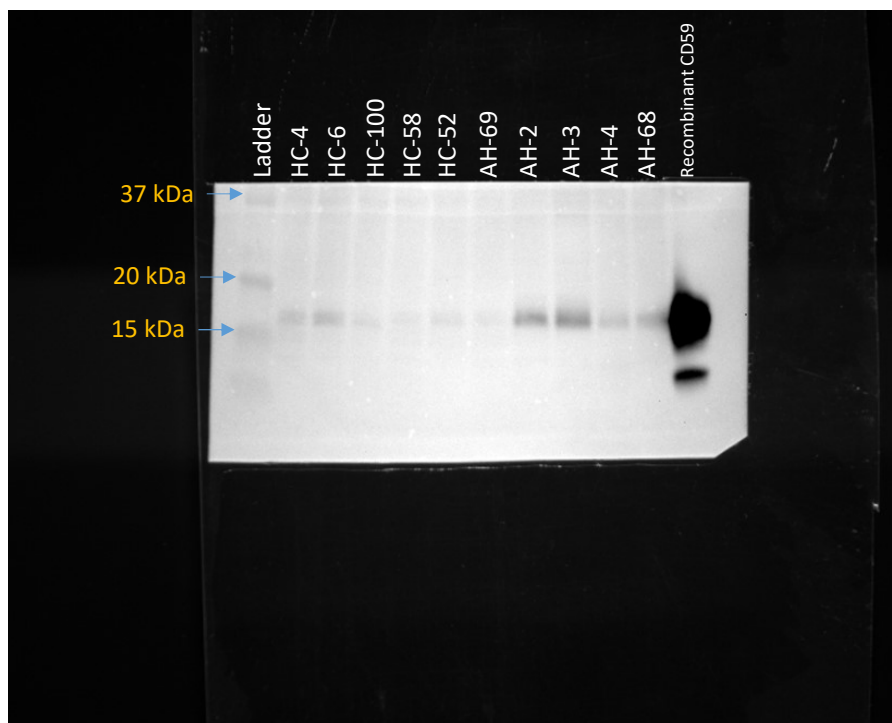

Recombinant protein was  
Too strong, cut off  
Last lane to re-probe
